# Supplementary material
Source: Atypon-hosted journal article supplement (doi:10.1287/opre.2022.0423)

# Clinch vs. Security Search (Setting 1)

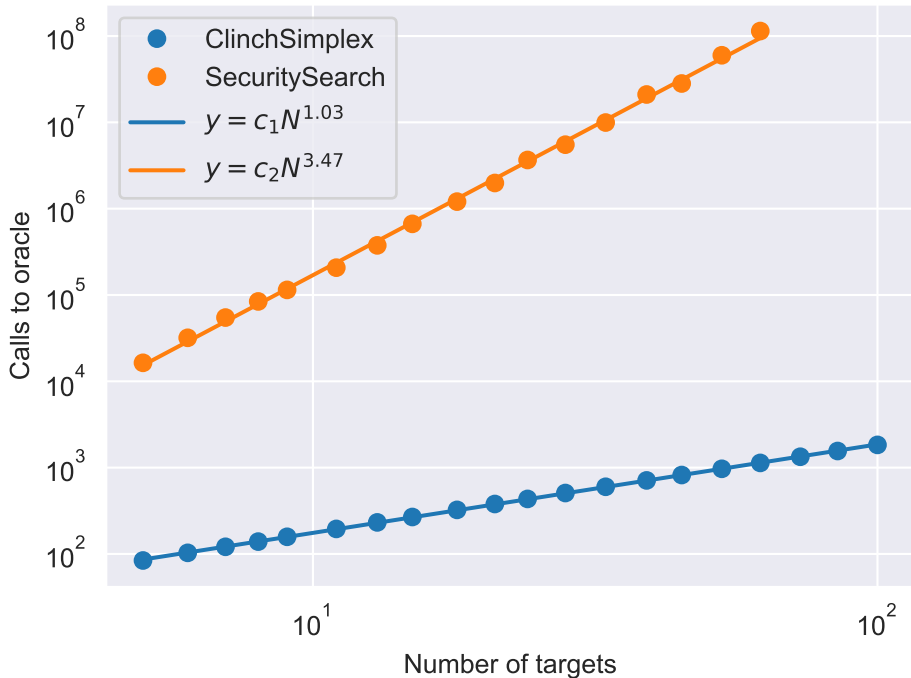

Supplement: opre.2022.0423.cd.zip [file plot_combined_setting_1.pdf › learning-stackelberg-games-main/results/sec3/plot_combined_setting_1.pdf]
